# Supplementary material for: The Introduction of a Full Medication Review Process in a Local Hospital: Successes and Barriers of a Pilot Project in the Geriatric Ward
Source: Pharmacy (Basel). 2018 Feb 28;6(1):21. doi: 10.3390/pharmacy6010021 (PMC5874560; doi:10.3390/pharmacy6010021)
Supplement: Supplementary file 1 [file pharmacy-06-00021-s001.pdf]

## A SUPPLEMENTARY TABLES

Table S1: Domains and themes in the action plan of the Belgian Government (2015-2020)

|                                                                                                                                         |
|-----------------------------------------------------------------------------------------------------------------------------------------|
| <b>Domains:</b>                                                                                                                         |
| 1. Optimizing medication use, using front- and back office strategies                                                                   |
| 2. Continuity of pharmacotherapy in light of transmural care                                                                            |
| 3. Scientific skills of the hospital pharmacist                                                                                         |
| 4. Transfer of information to and communication with the patient                                                                        |
| <b>Themes:</b>                                                                                                                          |
| 2015: anchoring the minimal conditions for the application of clinical pharmacy                                                         |
| 2016: development of a structured method for the anamnesis, registration and communication of the medication on admission and discharge |
| 2017: application of clinical pharmacy for specific therapies                                                                           |
| 2018: application of risk screening for patient groups                                                                                  |
| 2019: application of risk screening for medication groups or pathologies                                                                |
| 2020: evaluation of the development of clinical pharmacy in the Belgian hospitals and evaluation of the action plan 2015-2020           |

Table S2: Anatomical and therapeutic classes of the drugs involved in the discrepancies detected after medication reconciliation

|                                        | n (%)          | Example(s) of discrepancy                                           |
|----------------------------------------|----------------|---------------------------------------------------------------------|
| <b>Gastro-intestinal system</b>        | <b>43</b>      |                                                                     |
|                                        | <b>(35.2%)</b> |                                                                     |
| antacids                               | 6              | O: antacid PRN                                                      |
| antihistaminics                        | 1              | O: ranitidine 150 mg 1 pd                                           |
| proton pump inhibitors                 | 5              | O: pantoprazole 20 mg 1 pd                                          |
| propulsives                            | 3              | O: domperidone PRN; N: alizapride                                   |
| laxatives                              | 9              | O: macrogol PRN or 1 pd, bisacodyl PRN or 1 pd                      |
| antipropulsives                        | 2              | O: loperamide 1 pd                                                  |
| probiotics                             | 1              | O: frequent need for probiotics                                     |
| antidiabetics                          | 1              | D: dose repaglinide unknown                                         |
| multivitamins                          | 5              | O: multivitamins 1 pd                                               |
| vitamin D                              | 5              | O: vitamin D 1 per week                                             |
| vitamin B                              | 2              | N: vitamin B complex                                                |
| Calcium/Vitamin D                      | 3              | O: Calcium/vitamin D, F: chew tablet (not effervescent tablet)      |
| <b>Nervous system</b>                  | <b>26</b>      |                                                                     |
|                                        | <b>(21.3%)</b> |                                                                     |
| analgesics                             | 18             | O: paracetamol 1 g PRN or 3 pd                                      |
| benzodiazepines                        | 2              | N: lormetazepam 1 mg 1 pd                                           |
| antidepressants                        | 6              | O: duloxetine 60 mg 1 pd, M: mirtazapine 15 mg at 20:00 (not 08:00) |
| <b>Blood and cardiovascular system</b> | <b>17</b>      |                                                                     |
|                                        | <b>(13.9%)</b> |                                                                     |

|                                                   |                 |                                                              |
|---------------------------------------------------|-----------------|--------------------------------------------------------------|
| antithrombotics                                   | 3               | O: fenprocoumon; D: rivaroxaban 15 mg (not 20 mg)            |
| folic acid                                        | 1               | D: folic acid 1 mg (not 4 mg)                                |
| vasodilators                                      | 1               | O: molsidomine 16 mg 1 pd                                    |
| diuretics                                         | 5               | O: indapamide 2,5 mg 1 pd; N: bumetanide 1 mg 1 pd           |
| beta blockers                                     | 2               | O: bisoprolol 5 mg 1 pd; D: bisoprolol 5 mg (not 10 mg)      |
| calcium channel blockers                          | 1               | O: amlodipine 5 mg 1 pd                                      |
| combinations                                      | 1               | D: irbesartan/hydrochlorthiazide 300/50 mg (not 300/12,5 mg) |
| statins                                           | 3               | O: simvastatin 20 mg 1 pd                                    |
| <b>Sensory organs</b>                             | <b>9 (7.4%)</b> |                                                              |
| artificial tears                                  | 6               | O: daily drops dry eyes                                      |
| antiglaucoma preparations                         | 2               | O: latanoprost eyes drops                                    |
| nasal decongestants                               | 1               | O: nasal spray (framycetine, prednisolone, nafazoline)       |
| <b>Dermatologicals</b>                            | <b>8 (6.6%)</b> |                                                              |
| antifungals                                       | 3               | O: miconazol 2% spray PRN                                    |
| antibiotics                                       | 1               | N: fusidic acid 20 mg/g cream                                |
| corticosteroids                                   | 1               | O: bethamethason valerate 0,1% cream very frequently         |
| anti-inflammatory                                 | 3               | O: diclofenac 2% cream PRN                                   |
| <b>Musculo-skeletal system</b>                    | <b>4 (3.3%)</b> |                                                              |
| anti-gout preparations                            | 2               | D: allopurinol 300 mg 1 pd (not 100 mg)                      |
| bone structure and mineralization                 | 2               | O: denosumab 60 mg 1 per 6 months                            |
| <b>Respiratory system</b>                         | <b>4 (3.3%)</b> |                                                              |
| corticosteroids                                   | 1               | O: budesonide 200 µg inhalation 2 pd                         |
| mucolytics                                        | 1               | D: acetylcysteine 600 mg 1 pd (not 200 mg)                   |
| antihistaminics                                   | 2               | D: cetirizine 10 mf 1 pd (not PRN)                           |
| <b>Hormonal system</b>                            | <b>2 (1.6%)</b> |                                                              |
| corticosteroids                                   | 1               | O: prednisone                                                |
| antithyroids                                      | 1               | N: thiamazole                                                |
| <b>Genito-urinary system and sex hormones</b>     | <b>2 (1.6%)</b> |                                                              |
| alpha antagonists                                 | 1               | N: tamsulosine 0,4 mg                                        |
| other                                             | 1               | O: fenazopyridine 100 mg 1 pd                                |
| <b>Anti-infectives for systemic use</b>           | <b>2 (1.6%)</b> |                                                              |
| antifungals                                       | 1               | DU: fluconazole 200 mg 1 per week already for 3 months       |
| other                                             | 1               | N: nifurtiöinol                                              |
| <b>Allergy previously not in file</b>             | <b>2 (1.6%)</b> | phenobarbital allergy (documented by general physician)      |
| <b>Homeopathic preparations</b>                   | <b>2 (1.6%)</b> |                                                              |
| <b>Antineoplastic and immunomodulating agents</b> | <b>1 (0.8%)</b> |                                                              |
| antimetabolites                                   | 1               | M: methotrexate 5 mg subcutaneous weekly (not oral)          |

D: wrong dose; DU: duration of therapy; F: formulation; M: modality of administration (route, time);  
N: not on current medication list; O: omission; pd: per day; PRN: pro re nata (if needed)

Table S3: detected PIMs with the GheoP<sup>3</sup>S tool (a) and the STOPP/START tool

| <b>S3(a): detected PIMs with the GheoP<sup>3</sup>S tool</b>                                                                                                                                                                                                                                       |                                                                                                                                      |                              |                                               |
|----------------------------------------------------------------------------------------------------------------------------------------------------------------------------------------------------------------------------------------------------------------------------------------------------|--------------------------------------------------------------------------------------------------------------------------------------|------------------------------|-----------------------------------------------|
| <b>Positive items</b>                                                                                                                                                                                                                                                                              |                                                                                                                                      | <b>prevalence n<br/>= 87</b> | <b>number of<br/>patients<br/>n (%), n=22</b> |
| <i>Part 1: potentially inappropriate drugs, independent of diagnosis</i>                                                                                                                                                                                                                           |                                                                                                                                      |                              |                                               |
| <i>Item number</i>                                                                                                                                                                                                                                                                                 |                                                                                                                                      |                              |                                               |
| 1                                                                                                                                                                                                                                                                                                  | Any antidepressant ≥ 1 year                                                                                                          | 8                            | 7 (32%)                                       |
| 26                                                                                                                                                                                                                                                                                                 | Rivaroxaban                                                                                                                          | 5                            | 5 (23%)                                       |
| 5                                                                                                                                                                                                                                                                                                  | Any short- or long-acting benzodiazepine                                                                                             | 3                            | 3 (14%)                                       |
| 9                                                                                                                                                                                                                                                                                                  | Any PPI at full dose ≥ 8 weeks                                                                                                       | 3                            | 3 (14%)                                       |
| 8                                                                                                                                                                                                                                                                                                  | Any oral NSAID                                                                                                                       | 2                            | 2 (9%)                                        |
| 16                                                                                                                                                                                                                                                                                                 | Dabigatran                                                                                                                           | 2                            | 2 (9%)                                        |
| 4                                                                                                                                                                                                                                                                                                  | Any intermediate acting benzodiazepine or Z-product at full dose or any dose ≥ 30 subsequent days OR                                 | 1                            | 1 (5%)                                        |
| Add                                                                                                                                                                                                                                                                                                | Sotalol for rate control                                                                                                             | 1                            | 1 (5%)                                        |
| <i>Part 2: potentially inappropriate drugs, dependent of diagnosis</i>                                                                                                                                                                                                                             |                                                                                                                                      |                              |                                               |
| Add                                                                                                                                                                                                                                                                                                | Drugs in renal impairment or congestive heart failure <sup>a</sup>                                                                   | 13                           | 6 (27%)                                       |
| 40                                                                                                                                                                                                                                                                                                 | Thiazide and loop diuretics with gout                                                                                                | 4                            | 4 (18%)                                       |
| 33                                                                                                                                                                                                                                                                                                 | Anticholinergics with known dementia or cognitive impairment                                                                         | 2                            | 2 (9%)                                        |
| 36                                                                                                                                                                                                                                                                                                 | Calcium channel blockers with constipation                                                                                           | 1                            | 1 (5%)                                        |
| <i>Part 3: PPOs</i>                                                                                                                                                                                                                                                                                |                                                                                                                                      |                              |                                               |
| 45                                                                                                                                                                                                                                                                                                 | The patient has an elevated risk for osteoporosis (determined via FRAX tool) and is not prescribed calcium/vitamin D supplementation | 14                           | 14 (64%)                                      |
| 47                                                                                                                                                                                                                                                                                                 | The patient did not receive yearly influenza vaccination                                                                             | 8                            | 8 (36%)                                       |
| Add                                                                                                                                                                                                                                                                                                | Start statin in secondary prevention when a patient has elevated total cholesterol and a good life expectancy                        | 1                            | 1 (5%)                                        |
| <i>Part 4: DDIs of specific relevance</i>                                                                                                                                                                                                                                                          |                                                                                                                                      |                              |                                               |
| 65                                                                                                                                                                                                                                                                                                 | Oral diabetic/insulin + cardio selective beta blocker                                                                                | 7                            | 5 (23%)                                       |
| 77                                                                                                                                                                                                                                                                                                 | Any combination of anticholinergic drugs                                                                                             | 4                            | 4 (18%)                                       |
| 50                                                                                                                                                                                                                                                                                                 | RAAS inhibitor + potassium sparing diuretic/potassium containing drugs                                                               | 2                            | 2 (9%)                                        |
| 49                                                                                                                                                                                                                                                                                                 | VKA + oral NSAID                                                                                                                     | 1                            | 1 (5%)                                        |
| 54                                                                                                                                                                                                                                                                                                 | Oral NSAID + diuretic                                                                                                                | 1                            | 1 (5%)                                        |
| 61                                                                                                                                                                                                                                                                                                 | RAAS inhibitor + oral NSAID                                                                                                          | 1                            | 1 (5%)                                        |
| 64                                                                                                                                                                                                                                                                                                 | Oral diabetic/insulin + non-selective beta blocker                                                                                   | 1                            | 1 (5%)                                        |
| 74                                                                                                                                                                                                                                                                                                 | Calcium + levothyroxine                                                                                                              | 1                            | 1 (5%)                                        |
| 75                                                                                                                                                                                                                                                                                                 | Bisphosphonate + Ca <sup>2+</sup> , Mg <sup>2+</sup> , Zn <sup>2+</sup> , Fe <sup>2+</sup> or Al <sup>3+</sup>                       | 1                            | 1 (5%)                                        |
| Add: additional screening items not included in initial GheOP <sup>3</sup> S tool; DDI: drug-drug interaction; NSAID: nonsteroidal anti-inflammatory drugs; PPI: proton pump inhibitor; PPO: potential prescribing omission; RAAS: renin-angiotensin-aldosterone system; VKA: vitamin K antagonist |                                                                                                                                      |                              |                                               |

<sup>a</sup> Drugs in renal impairment (GFR < 50 ml/min): RAAS inhibitors, any potassium sparing diuretic, chlortalidon and thiazides, allopurinol, amoxicillin with full dose clavulanic acid, ciprofloxacin, dabigatran, metformin, nitrofurantoin, norfloxacin, sotalol; drugs in congestive heart failure: verapamil

| <b>S3 (b): detected PIMs with the STOPP/START tool</b>                                                                                                                               |                         |                                               |
|--------------------------------------------------------------------------------------------------------------------------------------------------------------------------------------|-------------------------|-----------------------------------------------|
| <b>Positive items</b>                                                                                                                                                                | <b>prevalence<br/>n</b> | <b>number of<br/>patients<br/>(%), n = 19</b> |
| <b>STOPP criteria</b>                                                                                                                                                                | <b>135</b>              |                                               |
| <i>Indication of medication</i>                                                                                                                                                      |                         |                                               |
| Any drug prescribed without an evidence-based clinical indication                                                                                                                    | 51                      | 18 (95%)                                      |
| Any duplicate drug-class prescription                                                                                                                                                | 9                       | 8 (42%)                                       |
| Any drug prescribed beyond the recommended duration, where treatment duration is well defined                                                                                        | 1                       | 1 (5%)                                        |
| <i>Cardiovascular system</i>                                                                                                                                                         |                         |                                               |
| Beta blocker in combination with verapamil or diltiazem                                                                                                                              | 2                       | 2 (11%)                                       |
| Loop diuretic as first-line treatment for hypertension                                                                                                                               | 2                       | 2 (11%)                                       |
| Thiazide diuretic with history of gout or hypo-K, hypo-Na or hyper-Ca                                                                                                                | 2                       | 2 (11%)                                       |
| Loop diuretic for the treatment of hypertension with concurrent urinary incontinence                                                                                                 | 2                       | 2 (11%)                                       |
| Verapamil or diltiazem with NYHA class III or IV heart failure                                                                                                                       | 1                       | 1 (5%)                                        |
| <i>Antiplatelet/Anticoagulant drugs</i>                                                                                                                                              |                         |                                               |
| VKA, direct thrombin inhibitor or factor Xa inhibitor for first pulmonary embolus without continuing provoking risk factors for > 12 months                                          | 2                       | 2 (11%)                                       |
| VKA, direct thrombin inhibitor or factor Xa inhibitor for first deep venous thrombosis without continuing provoking risk factors for > 6 months                                      | 1                       | 1 (5%)                                        |
| <i>Central Nervous system and psychotropic drugs</i>                                                                                                                                 |                         |                                               |
| Benzodiazepines for ≥ 4 weeks                                                                                                                                                        | 19                      | 13 (68%)                                      |
| TCA with dementia, narrow angle glaucoma, cardiac conduction abnormalities, prostatism, or prior history of urinary retention                                                        | 1                       | 1 (5%)                                        |
| Acetylcholinesterase inhibitors with known history of persistent bradycardia, heart block or recurrent unexplained syncope or concurrent treatment with drugs that reduce heart rate | 1                       | 1 (5%)                                        |
| First-generation antihistamines                                                                                                                                                      | 1                       | 1 (5%)                                        |
| TCA as first line antidepressant treatment                                                                                                                                           | 1                       | 1 (5%)                                        |
| <i>Renal system</i>                                                                                                                                                                  |                         |                                               |
| NSAID with eGFR < 50 ml/min                                                                                                                                                          | 1                       | 1 (5%)                                        |
| <i>Gastrointestinal system</i>                                                                                                                                                       |                         |                                               |
| PPI for uncomplicated peptic ulcer disease or erosive peptic oesophagitis at full therapeutic dosage for > 8 weeks                                                                   | 2                       | 2 (11%)                                       |

|                                                                                                                                               |           |          |
|-----------------------------------------------------------------------------------------------------------------------------------------------|-----------|----------|
| Drugs likely to cause constipation where non-constipating alternatives are available                                                          | 1         | 1 (5%)   |
| <i>Musculoskeletal System</i>                                                                                                                 |           |          |
| Oral bisphosphonate with current or recent history of upper gastrointestinal disease, peptic ulcer disease or upper gastrointestinal bleeding | 1         | 1 (5%)   |
| <i>Urogenital system</i>                                                                                                                      |           |          |
| Anticholinergic drugs with dementia, chronic cognitive impairment, narrow-angle glaucoma or chronic prostatism                                | 1         | 1 (5%)   |
| <i>Drugs that adversely affect those prone to falls</i>                                                                                       |           |          |
| Benzodiazepines                                                                                                                               | 19        | 13 (68%) |
| Neuroleptic drugs                                                                                                                             | 2         | 2 (11%)  |
| Vasodilator drugs known to cause hypotension in those with persistent postural hypotension                                                    | 1         | 1 (5%)   |
| hypnotic Z-drugs                                                                                                                              | 1         | 1 (5%)   |
| <i>Analgesic drugs</i>                                                                                                                        |           |          |
| Oral or transdermal strong opioids as first line therapy for mild pain                                                                        | 2         | 2 (11%)  |
| Long-acting opioids without short-acting opioids for break-through pain                                                                       | 1         | 1 (5%)   |
| <i>Anticholinergic drugs</i>                                                                                                                  |           |          |
| Concomitant use of 2 or more drugs with anticholinergic properties                                                                            | 7         | 7 (37%)  |
| <b>START criteria</b>                                                                                                                         | <b>19</b> |          |
| <i>Cardiovascular system</i>                                                                                                                  |           |          |
| Statin therapy with history of coronary, cerebral, or peripheral vascular disease without contraindication                                    | 2         | 2 (11%)  |
| ACE inhibitor with systolic heart failure and/or documented coronary artery disease                                                           | 1         | 1 (5%)   |
| <i>Respiratory system</i>                                                                                                                     |           |          |
| Regular inhaled $\beta_2$ agonist or anticholinergic agent for mild to moderate asthma or COPD                                                | 1         | 1 (5%)   |
| <i>Central Nervous system and Eyes</i>                                                                                                        |           |          |
| SSRI (or SNRI or pregabalin if SSRI contraindicated) in persistent severe anxiety that interferes with independent functioning                | 1         | 1 (5%)   |
| <i>Musculoskeletal System</i>                                                                                                                 |           |          |
| Calcium/vitamin D supplement in patients with known osteoporosis and/or previous fragility fracture(s)                                        | 4         | 4 (21%)  |
| Vitamin D supplement in housebound patients, patients experiencing falls or patients with osteopenia                                          | 6         | 6 (32%)  |
| <i>Vaccines</i>                                                                                                                               |           |          |
| Seasonal trivalent influenza vaccine                                                                                                          | 4         | 4 (21%)  |

ACE: angiotensin converting enzyme; PPI: proton-pump inhibitor; SNRI: serotonin and noradrenalin reuptake inhibitor; SSRI: selective serotonin reuptake inhibitor; TCA: tricyclic antidepressant; VKA: vitamin K antagonist
